# Supplementary material for: Preliminary Evidence on the Diagnostic and Molecular Role of Circulating Soluble EGFR in Non-Small Cell Lung Cancer
Source: MDPI journal article supplement (doi:10.3390/ijms160819612), 2015-08-19
Supplement: s1 [file s1]

## Supplementary Information

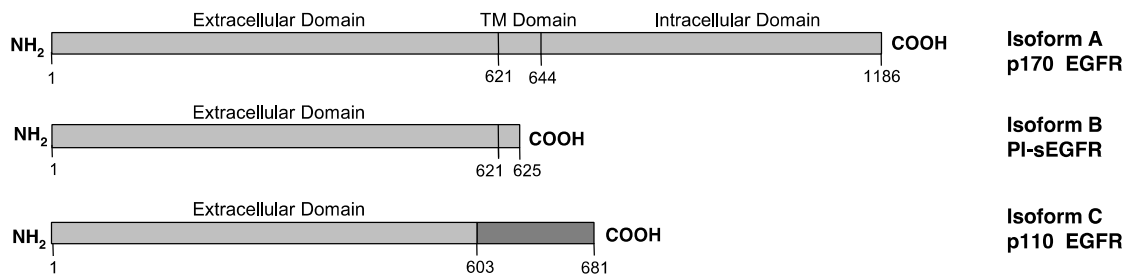

**Figure S1.** Diagrams representing specific EGFR isoforms. Isoform A correspond with the full-length EGFR (amino acids 1–1186) a transmembrane form having a molecular weight of 170 kDa. Isoform B and C represent both EGFR isoforms of about 110kDa, containing the same N-terminal portions and a different COOH-terminal. While Isoform B is called PI-sEGFR and arising from the proteolytic cleavage of EGFR holoreceptor between the amino acid residues 625–626, Isoform C (also called p110) has a 78 C-terminus unique amino acid sequence derived from EGFR gene alternative splicing. The C-terminal sequence of p110 is illustrated in dark gray.

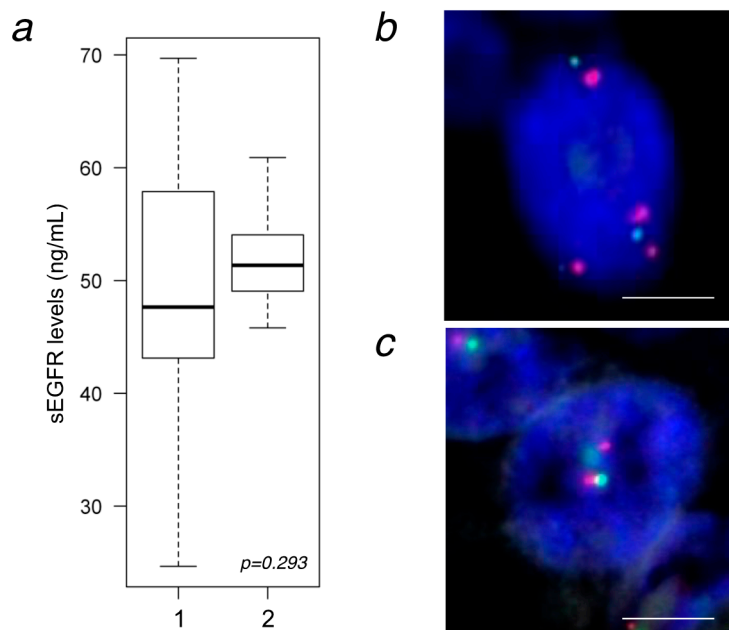

**Figure S2.** EGFR-copy number analysis and correlation with sEGFR levels in NSCLC patients. (a) Box plot depicts the sEGFR (ng/mL) levels in plasma from 30 patients having EGFR copy number wild type (1) and 7 patients with EGFR copy number amplification (2). Horizontal bold line, median value; the interquartile range is indicated above and below each bar; (b,c) Fluorescence in situ hybridization (FISH) for the EGFR gene expression in FFPE sections from lung tumors. Representative images of tumor samples with increased EGFR gene copy number (b) and tumors having wild type EGFR-copy number (c). Cells were counterstained with DAPI (blue) to label nuclei. SpectrumOrange-labeled probes hybridize to the entire EGFR gene region targeted, SpectrumGreen-labeled probes hybridize to the centromere of the chromosome appropriate for the gene-specific assay (chromosome 7; 7p11.1-q11.1). Magnification: 100×. Scale bar: 5µm
